# Supplementary material for: The simultaneous interaction of MSL2 with CLAMP and DNA provides redundancy in the initiation of dosage compensation in Drosophila males
Source: Oxford University Press journal article supplement (doi:10.1242/dev.179663), 2019-07-18
Supplement: dev179663supp.pdf [file dev179663supp.pdf]

## Supplementary Figures

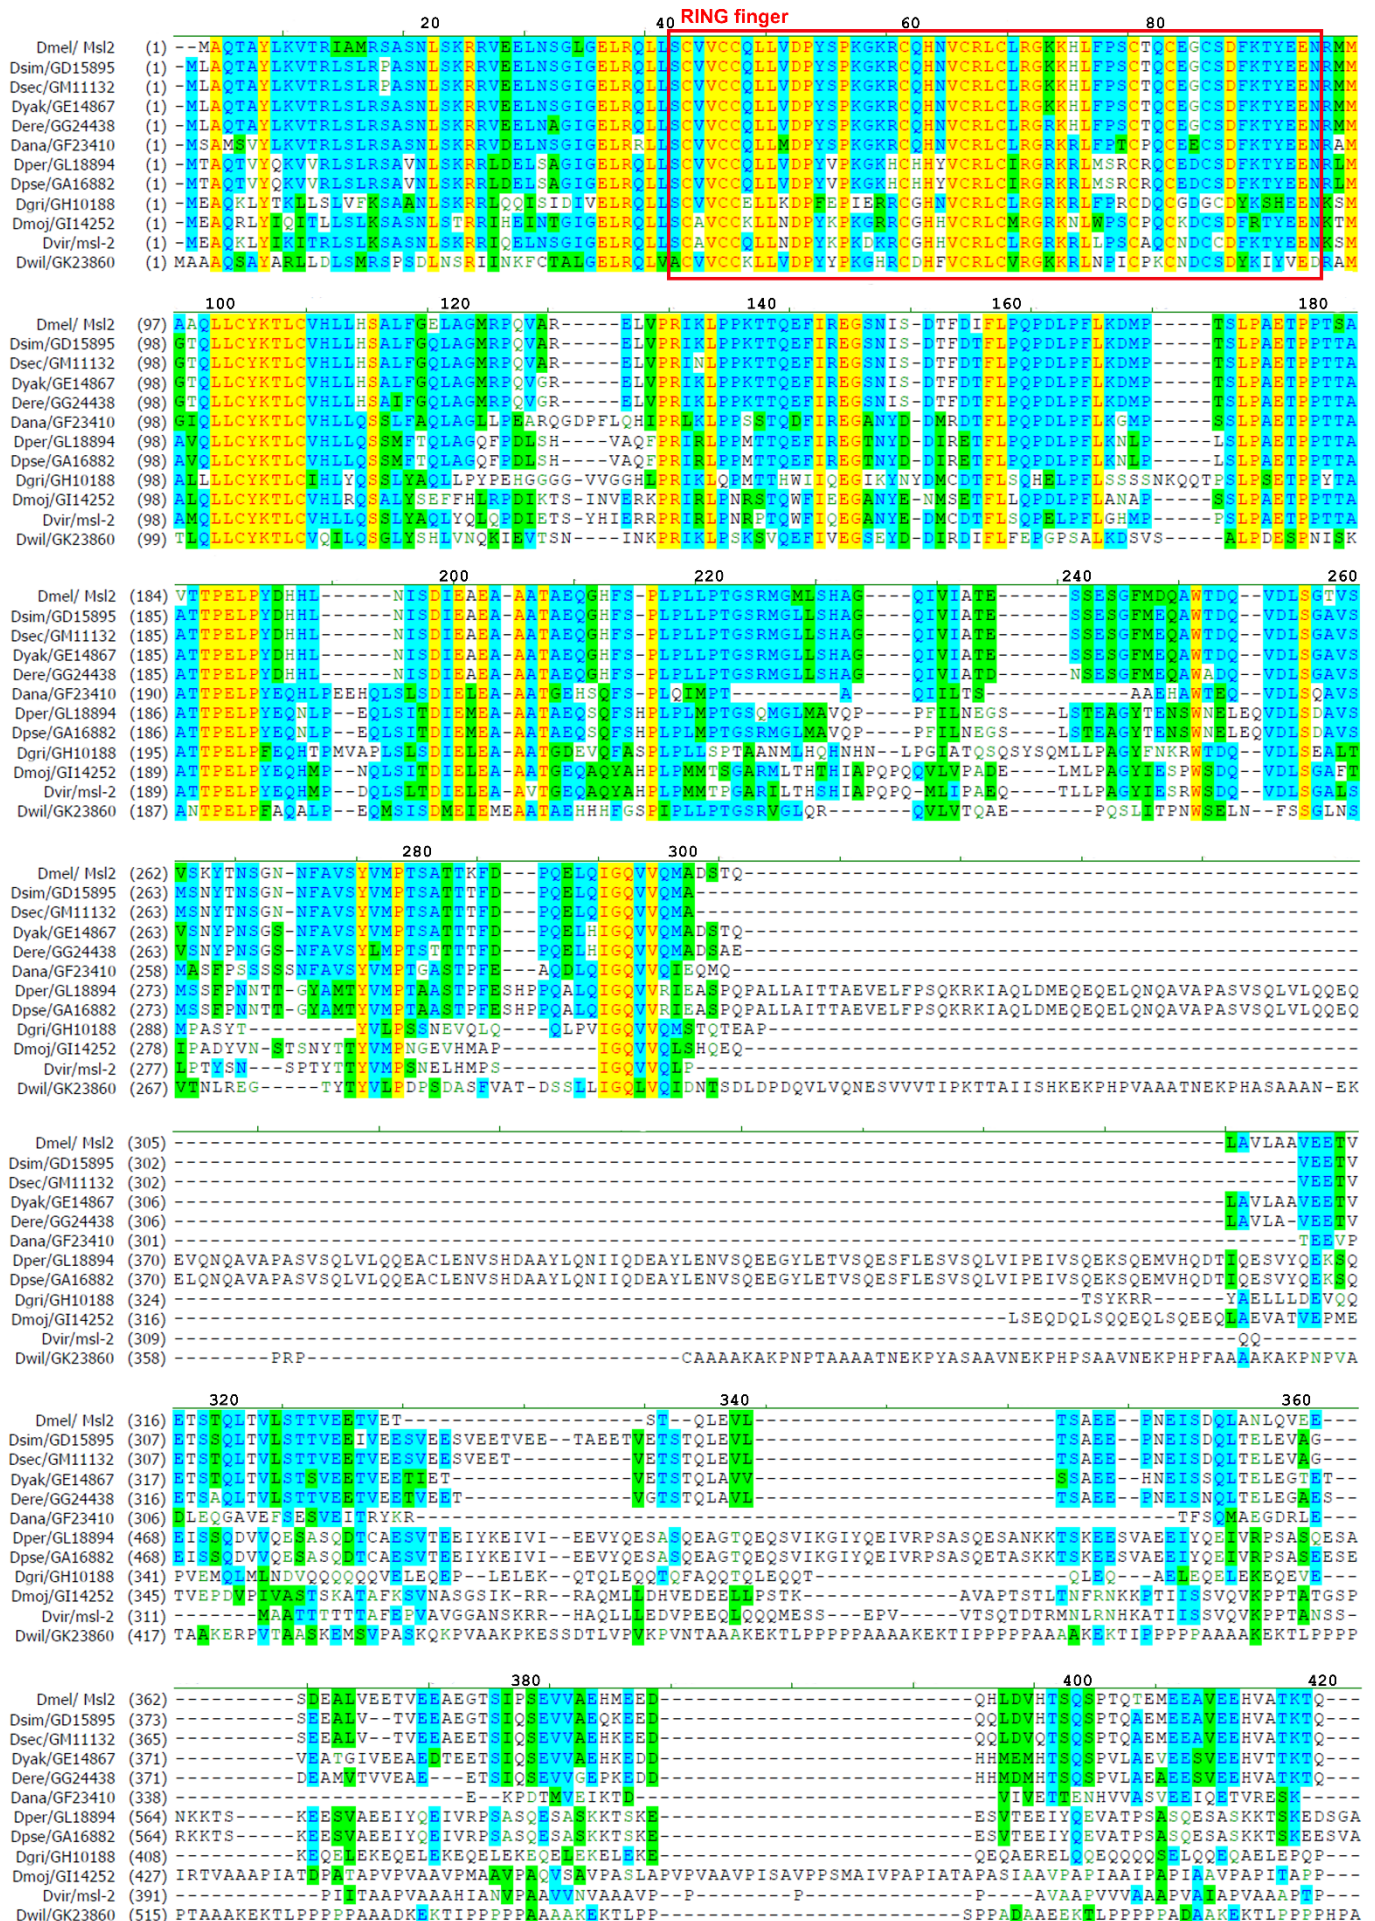

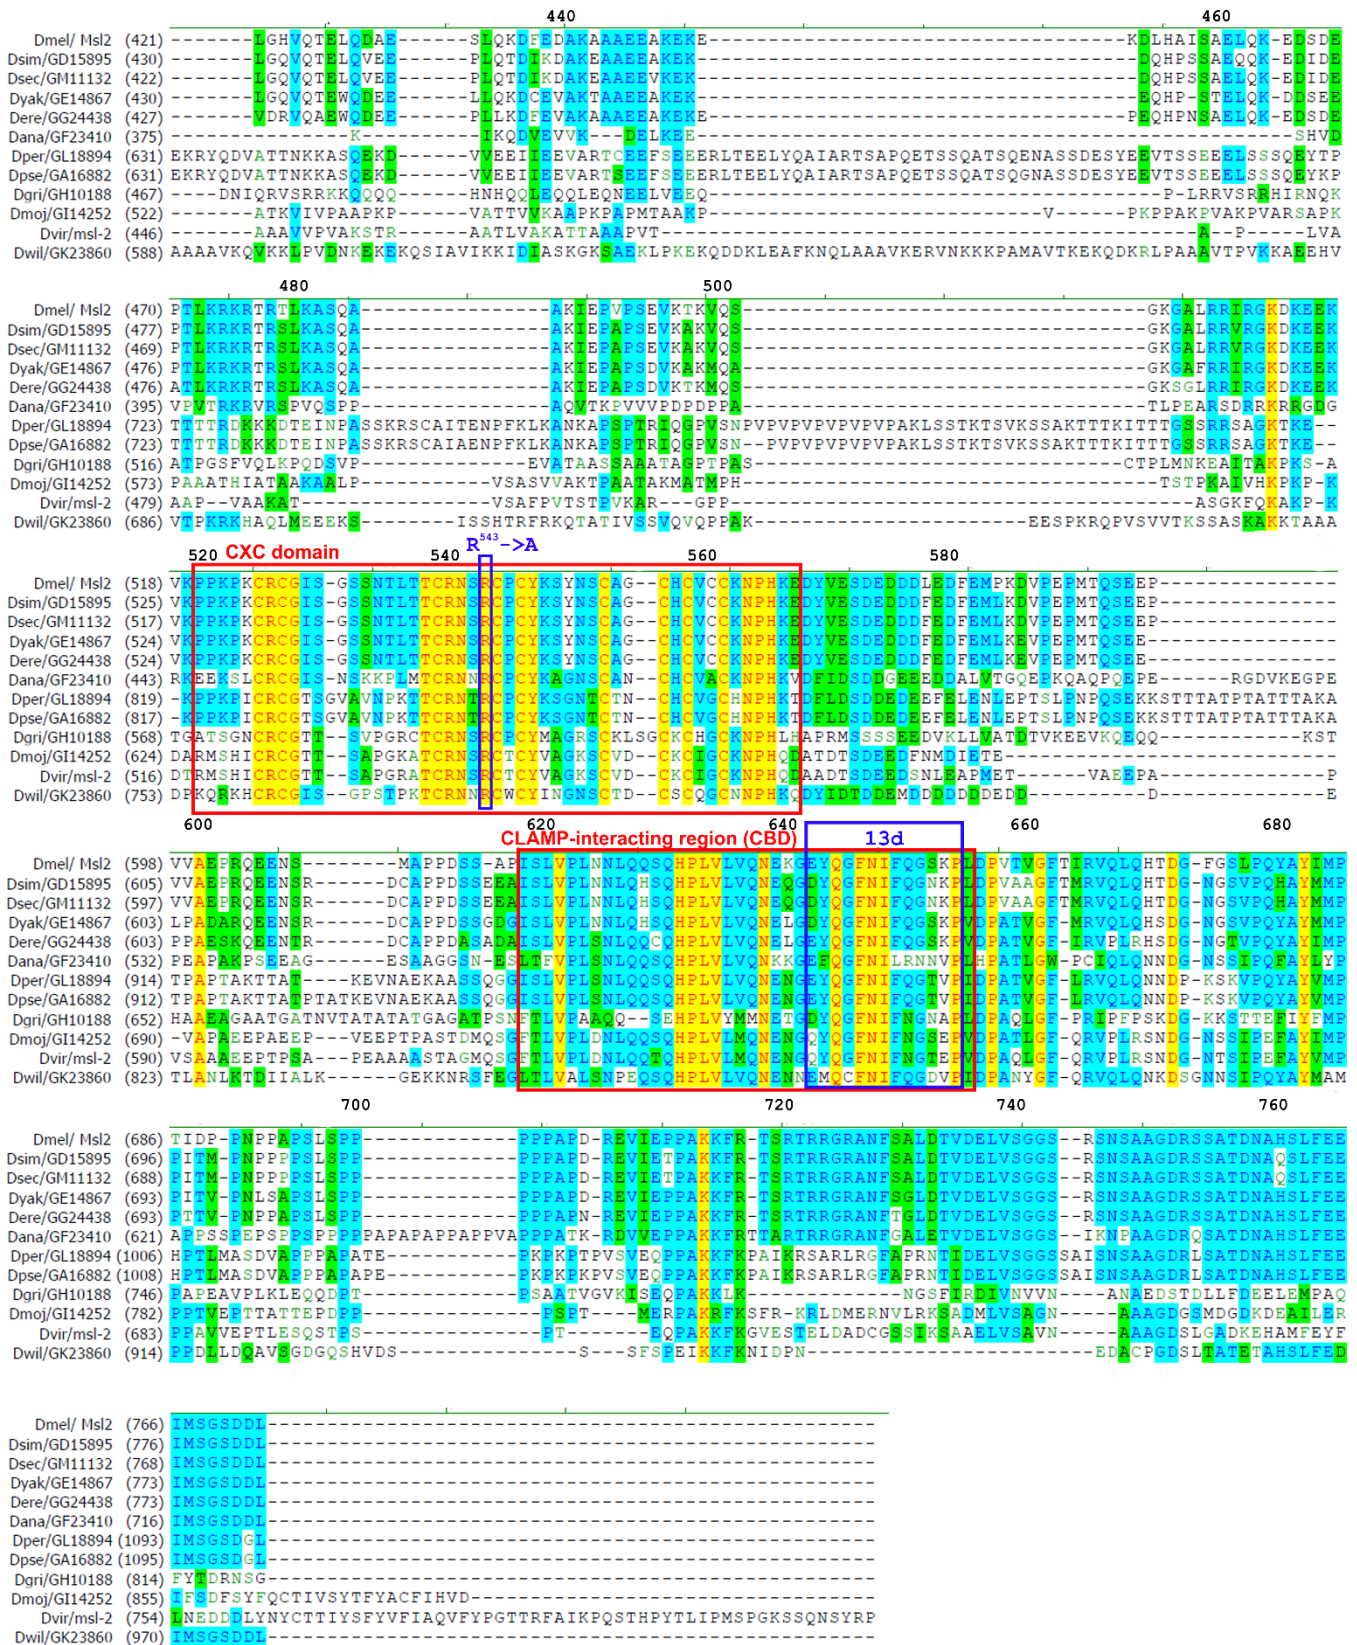

**Figure S1.** Alignment of MSL2 protein among Drosophilidae. Different regions are shown in the red frames. Also R543 amino acid residue and minimal 13 aa CLAMP-interacting region are marked in blue frames.

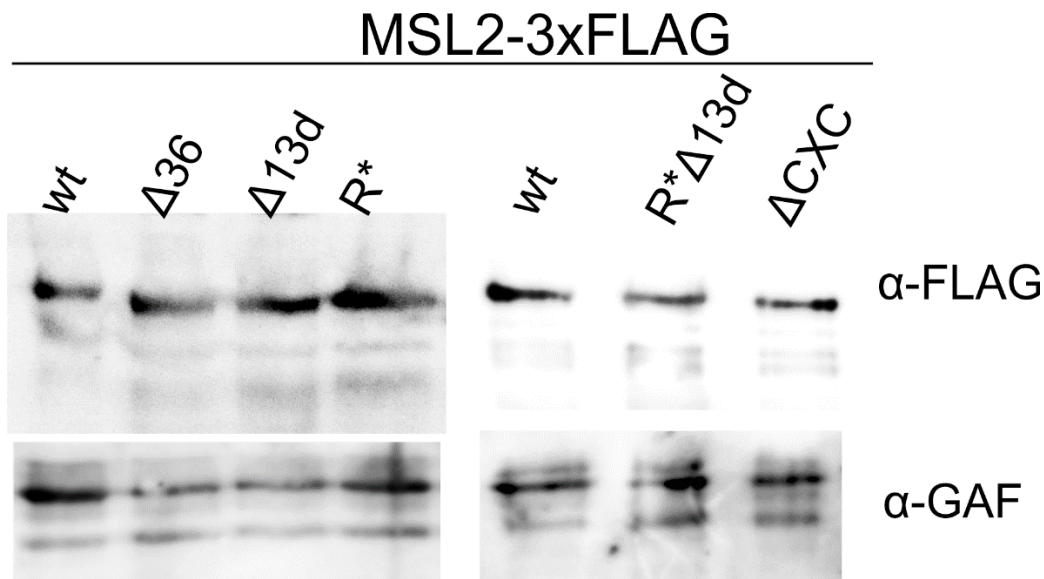

**Figure S2.**

Western blotting of protein extracts prepared from adult flies expressing different variants of 3xFLAG-tagged MSL2 protein (wild-type (wt), deletion of 36 ( $\Delta 36$ ) and 13 ( $\Delta 13d$ ) aa from CLAMP-binding region, substitution of arginine at the 543 position by alanine (R\*), simultaneous substitution of arginine at the 543 position by alanine and deletion of 13 aa from CLAMP-binding region (R\* $\Delta 13d$ ), deletion of CXC domain ( $\Delta CXC$ )). Immunoblot analysis was performed with FLAG and GAF antibodies (internal control).

♂ *msl2<sup>227</sup>*

**MSL2<sup>wt</sup>-3xFLAG**

FLAG MSL1 merged

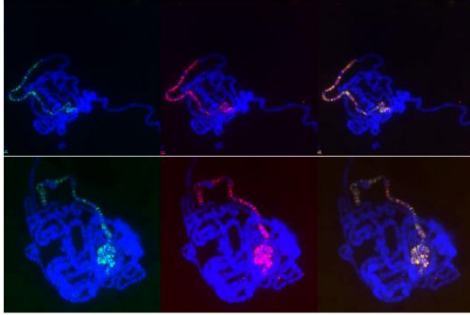

**MSL2<sup>Δ13d</sup>-3xFLAG**

FLAG MSL1 merged

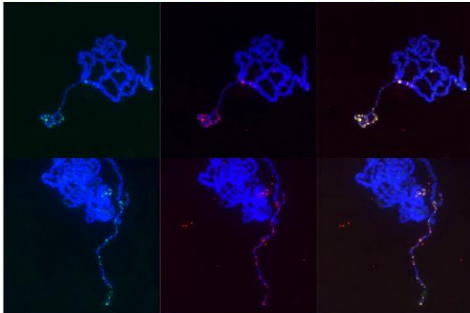

**MSL2<sup>R\*</sup>-3xFLAG**

FLAG MSL1 merged

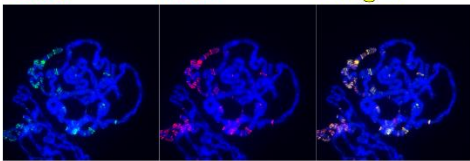

**MSL2<sup>ΔCXC</sup>-3xFLAG**

FLAG MSL1 merged

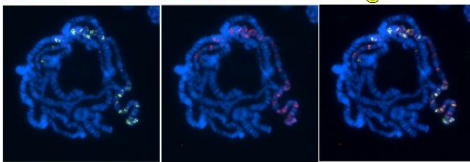

**MSL2<sup>R\*Δ13d</sup>-3xFLAG**

FLAG MSL1 merged

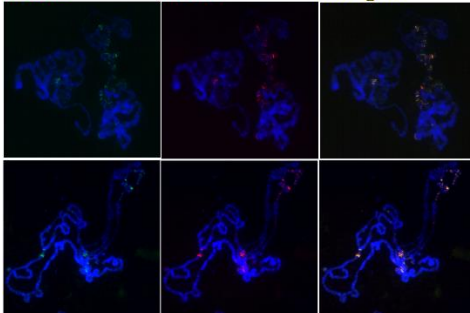

**Figure S3.** MSL1 and MSL2 localization on the polytene chromosomes from salivary glands of male 3<sup>rd</sup> instar larvae in the *msl2*-null (*msl2<sup>227</sup>*) background that express different FLAG-tagged variants of MSL2 protein: wild-type (wt), deletion of 13 aa from CLAMP-binding region ( $\Delta 13d$ ), substitution of arginine at the 543 position by alanine (R\*), deletion of CXC domain

( $\Delta$ CXC), simultaneous substitution of arginine at the 543 position by alanine and deletion of 13 aa from CLAMP-binding region (R\* $\Delta$ 13d). Panels show immunostaining of 3xFLAG-MSL2 protein with mouse anti-FLAG antibody (green) and MSL1 protein with corresponding rabbit antibody (red) on polytene chromosomes. DNA is stained with DAPI (blue).

♂ *msl2*<sup>227</sup>

**MSL2<sup>wt</sup>-3xFLAG**

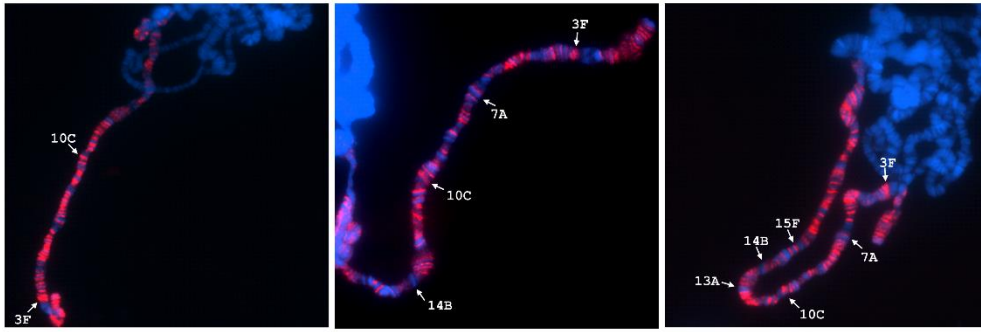

**MSL2<sup>Δ13d</sup>-3xFLAG**

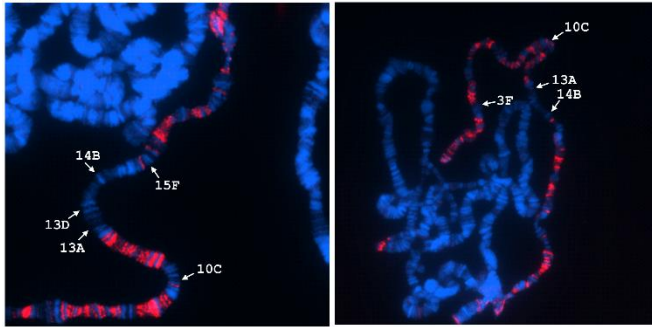

**MSL2**  
**DAPI**

**MSL2<sup>R+</sup>-3xFLAG**

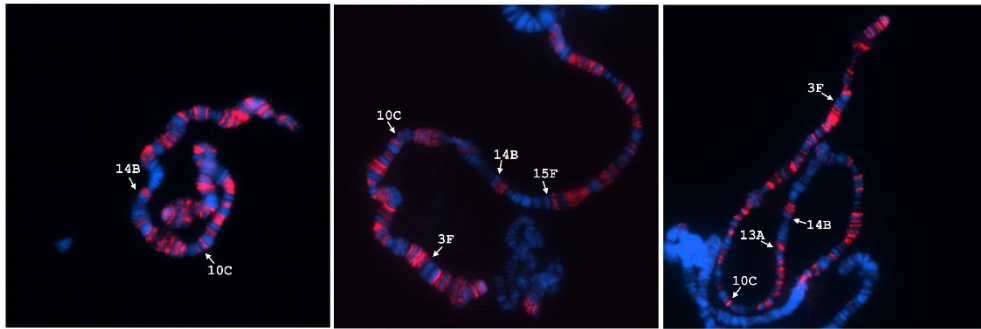

**MSL2<sup>ΔCXC</sup>-3xFLAG**

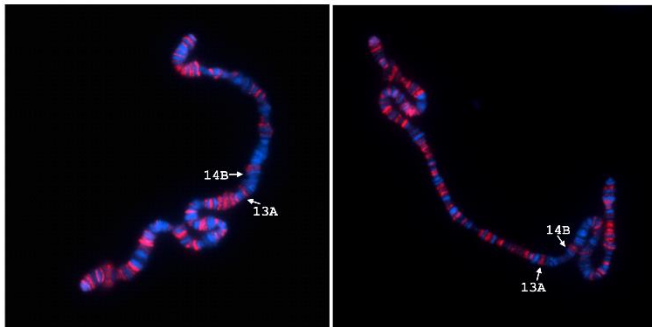

**MSL2<sup>R+Δ13d</sup>-3xFLAG**

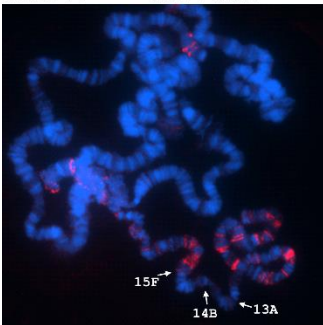

**Figure S4.** Comparing several sites of MSL complex binding at the high resolution cytological map on the polytene chromosomes from salivary glands of male 3<sup>rd</sup> instar larvae in the *msl2*-null (*msl2*<sup>227</sup>) background that expressed different FLAG-tagged variants of MSL2 protein: wild-

type (wt), deletion of 13 aa from CLAMP-binding region ( $\Delta$ 13d), substitution of arginine at the 543 position by alanine (R\*), deletion of CXC domain ( $\Delta$ CXC), simultaneous substitution of arginine at the 543 position by alanine and deletion of 13 aa from CLAMP-binding region (R\* $\Delta$ 13d). Panels show immunostaining of 3xFLAG-MSL2 protein with rabbit anti-MSL2 antibody (red) on polytene chromosomes. DNA is stained with DAPI (blue).

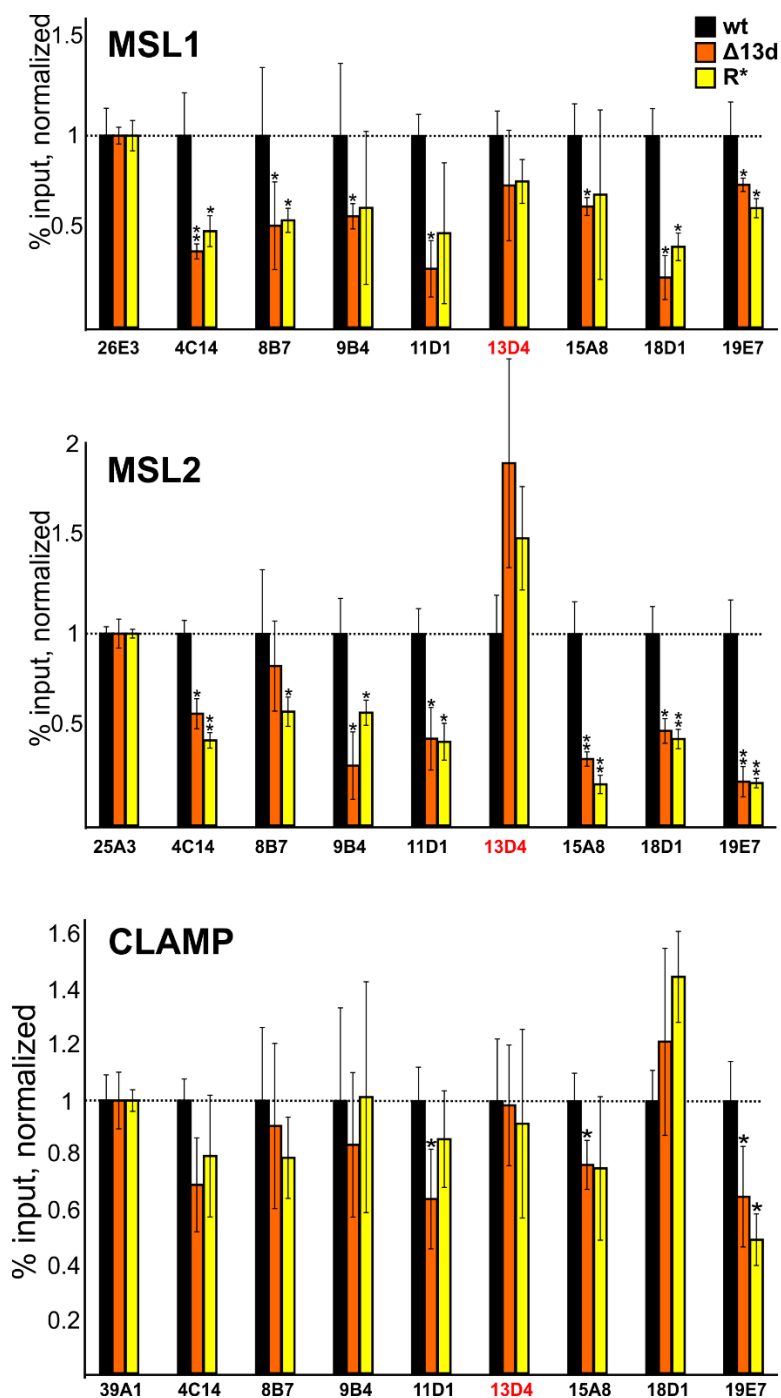

**Figure S5.** Comparing binding of MSL1, MSL2, and CLAMP at different CES and PionX (marked with red) regions in the MSL2-expressing males in the *msl2* <sup>$\gamma$ 227</sup> background. Histograms show ChIP enrichments at the CES regions on chromatin isolated from male flies expressing different variants (wt,  $\Delta 13d$ , R\*) of MSL2 protein. The results are presented as a percentage of input genomic DNA normalized to corresponding positive autosomal genome regions for MSL1(26E3) and MSL2 (25A3), and compared with binding levels in the flies with expressed wild type MSL2 protein (corresponding to the “1” on the scale). Error bars show standard deviations of quadruplicate PCR measurements for three independent experiments. Asterisks indicate significance levels: \* $p < 0.05$ , \*\* $p < 0.01$ .



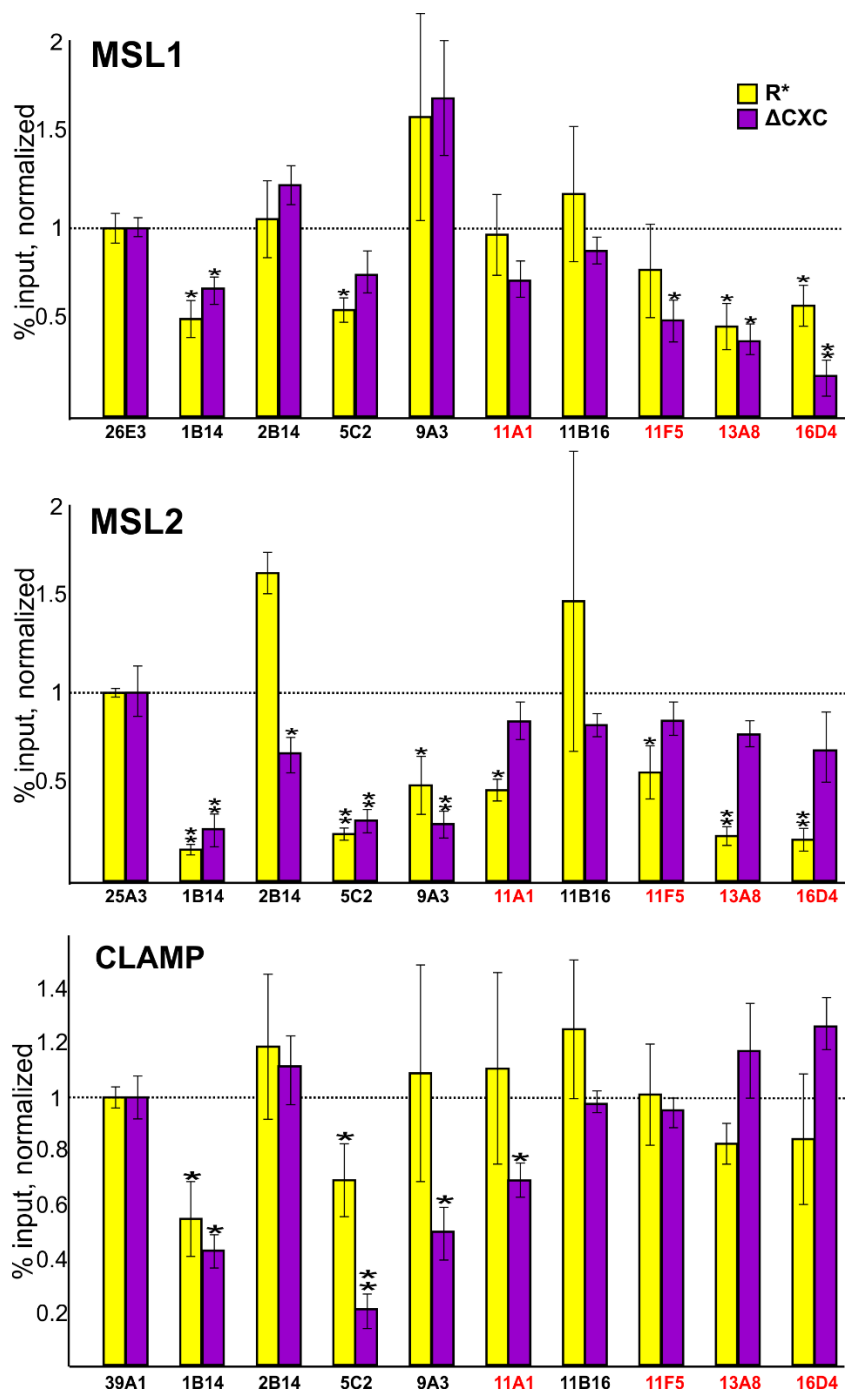

**Figure S6.** Comparing binding of MSL1, MSL2, and CLAMP at different CES and PionX (marked with red) regions in the MSL2-expressing flies in the *msl2*<sup>γ227</sup> background. Histograms show comparison of ChIP enrichments at the CES regions on chromatin isolated from male flies expressed MSL2 protein with substitution of arginine at the 543 position by alanine (R\*) and deletion of CXC domain (ΔCXC). The results are presented as a percentage of input genomic DNA normalized to corresponding positive autosomal genome regions for MSL1(26E3), MSL2 (25A3) and CLAMP (39A1), and compared with binding levels in the flies with expressed wild type MSL2 protein (corresponding to the “1” on the scale). Error bars show standard deviations of quadruplicate PCR measurements for three independent experiments. Asterisks indicate significance levels: \*p < 0.05, \*\*p < 0.01.

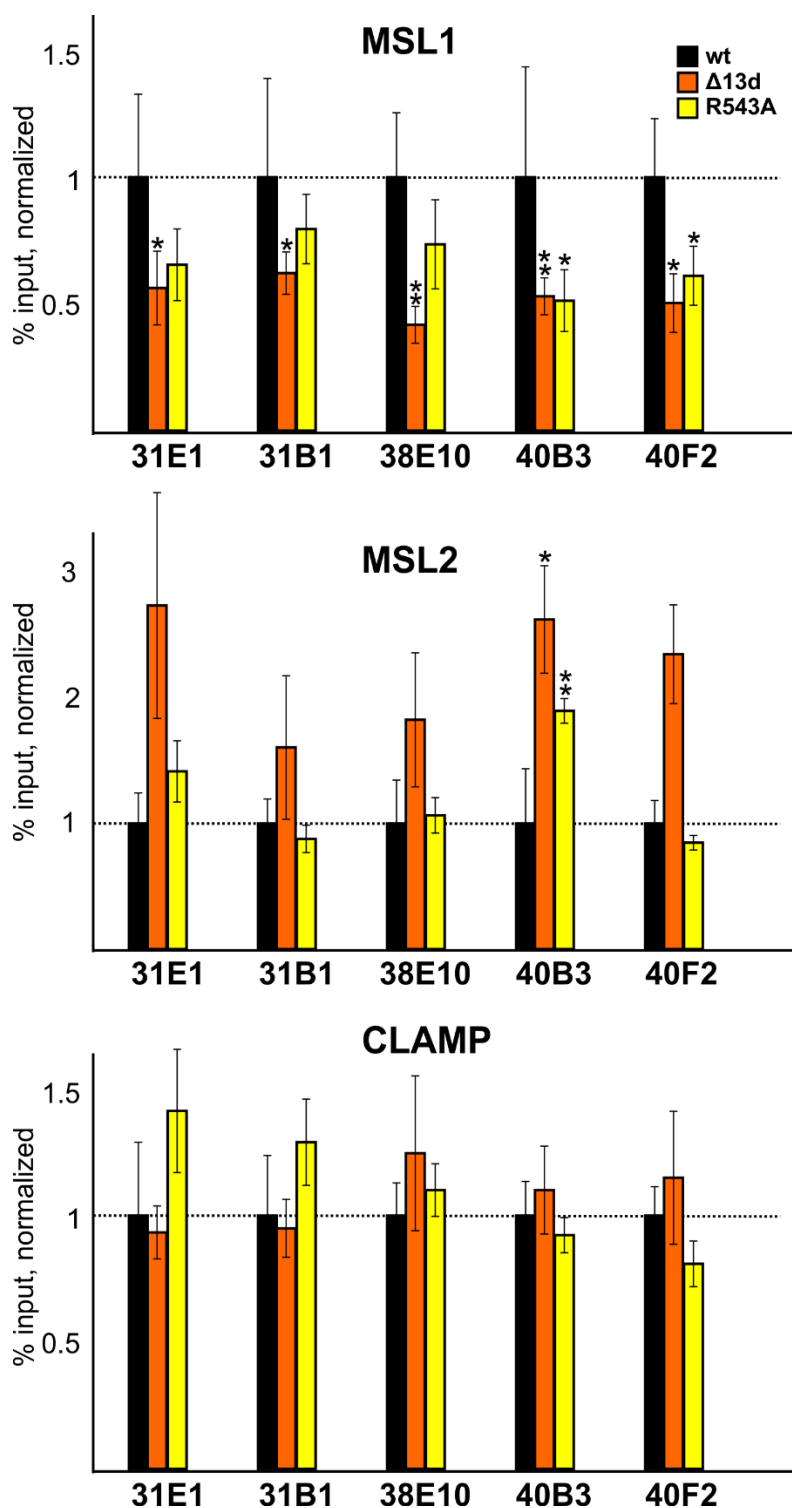

**Figure S7.** Comparing binding of MSL1, MSL2 and CLAMP at different autosomal genome regions in the MSL2-expressing flies in the *msl2<sup>γ227</sup>* background. Histograms show ChIP enrichments at the CES regions on chromatin isolated from male flies expressing different variants (wt,  $\Delta 13d$ , R543A) of MSL2 protein. The results are presented as a percentage of input genomic DNA normalized to corresponding positive autosomal genome regions for MSL1(26E3), MSL2 (25A3), and compared with binding levels in the flies with expressed wild type MSL2 protein (corresponding to the “1” on the scale). Error bars show standard deviations of quadruplicate PCR measurements for three independent experiments. Asterisks indicate significance levels: \* $p < 0.05$ , \*\* $p < 0.01$ .

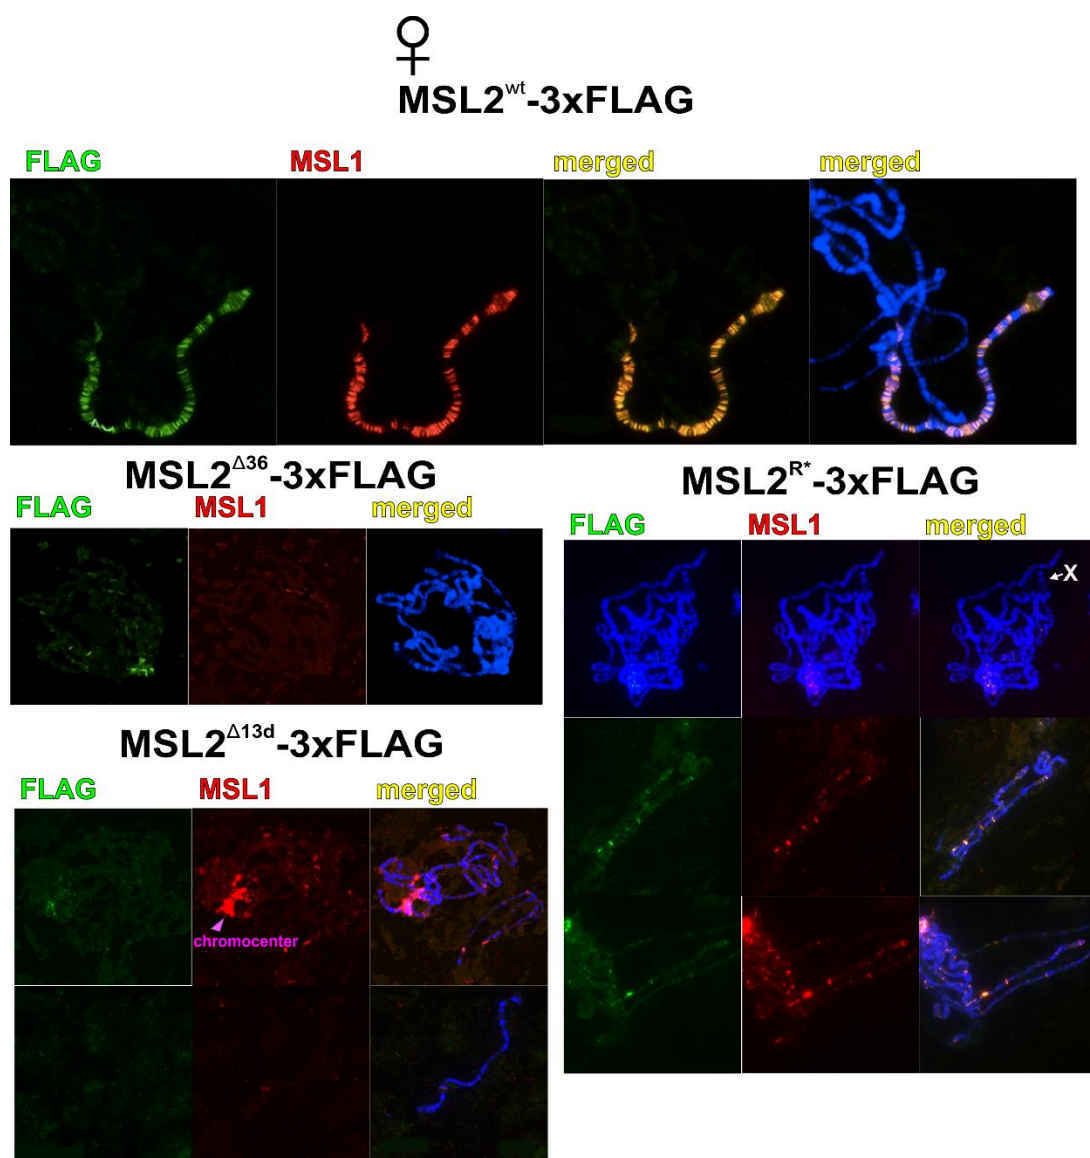

**Figure S8.** Distribution of MSL complex on the polytene chromosomes extracted from salivary glands of female 3<sup>rd</sup> instar larvae that express different FLAG-tagged variants of MSL2 protein: wild-type (wt), deletion of 36 ( $\Delta 36$ ) and 13 ( $\Delta 13d$ ) aa from CLAMP-binding region, substitution of arginine at the 543 position by alanine (R\*). Panels show immunostaining of 3xFLAG-MSL2 protein with mouse anti-FLAG antibody (green) and MSL1 protein with corresponding rabbit antibody (red) on polytene chromosomes. DNA is stained with DAPI (blue).

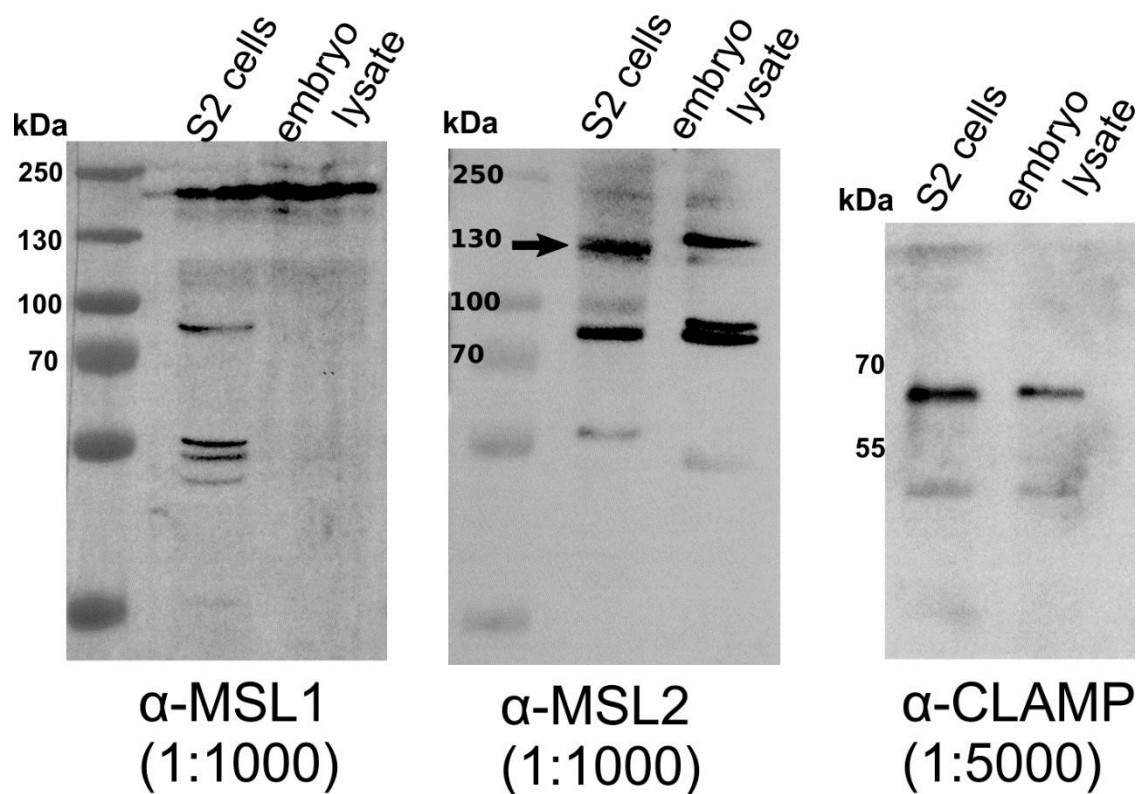

**Figure S9. Immunoblot analysis of affinity-purified antibodies for MSL1, MSL2, CLAMP proteins.**

## Supplementary Table

**Table S1. The list of used oligonucleotides.**

| Primers for cloning of <i>msl2</i> deletions |                               |                            |                                       |
|----------------------------------------------|-------------------------------|----------------------------|---------------------------------------|
| Name                                         | dir                           | rev                        |                                       |
| <i>msl2</i> _full-sized                      | TTCGATATCATGGCCCAGACGGCATACTT | CCCGGGCAAGTCATCCGAGCCCGA   |                                       |
| <i>msl2</i> _d13                             | AAAGGCGAGGATCCGGTCACCGTTGG    | GACCGGATCCTCGCCTTTCATTCT   |                                       |
| <i>msl2</i> _dB                              | CCACCGGCCCAACTTCTCGGCCCT      | GAAGTTGGCGGCCGGTGGCTCGATGA |                                       |
| <i>msl2</i> _dP                              | TATATAATGGCCAAGAAATTCAGGACC   | TTTCTTGCCATTATATAAGCATACT  |                                       |
| Primers for RT-qPCR                          |                               |                            |                                       |
| Name                                         | dir                           | rev                        | Taqman probe                          |
| RoX1                                         | CTTGTGCTTTCTCCTGAATGTG        | TGTATTAGGCGGAGCTTCTTG      | FAM-AGCCTATGAAATCCGGTCCAACCC-BHQ1     |
| RoX2                                         | TTCGAAACGTTCTCCGAAGC          | AGTCGTACTCATCTCACTGTCC     | FAM-AGCAAGAGTAACGATTTCGCGATAGTCG-BHQ1 |
| RpL34                                        | ACAACACACGCTCCAACA            | GGGTGATACCCTTCAACTTCTC     | FAM-TGGTAAACCAGACGACCACCGG-BHQ        |
| Primers for ChIP analysis                    |                               |                            |                                       |
| Genome region                                | dir                           | rev                        |                                       |
| RoX1                                         | AGGTCTGC AAGGTT CAGTTTAT      | ATTCTTAAGGGTGGCGTCTTC      |                                       |
| RoX2                                         | GGCTTAGAGAGAGATGGCAATAC       | AGTTCTGGTACCCTGGA          |                                       |
| CES1B14                                      | CAGGACAAGACTAGGACAAAAGG       | GGTTTGGCGATTGAGGATTATTG    |                                       |
| CES2B14                                      | CCCTCATATGCTTCTTCTGGTC        | ACGTACGATCACGCACATATC      |                                       |
| CES4C14                                      | ATTGGTATTCGGGCAAGGG           | GAGCATATTTCTCTCGAGGATGG    |                                       |
| CES5C2                                       | CAGAAATTCGAAGCGATCTCAAC       | AATCGACTGCTAGGTTGGTAAA     |                                       |
| CES8B7                                       | CAGCAGAACGCTCTTTGATTT         | CCAACATTGCTTCACACAC        |                                       |
| CES9A3                                       | TAATGCTGGATCTCGCTCAC          | CTGATCGCCGGTCATAGAAA       |                                       |
| CES9B4                                       | CGTGCCGCCTAACTATCTAAC         | GGGATGAAAGAGAGAGCAAA       |                                       |
| CES11A1                                      | GCCCGGAACCTCTTTAGTATG         | TGATGCCACTGGATGAGTATG      |                                       |
| CES11B16                                     | GGTGGTGGACATCTCGTTAAT         | ACCAGCGAATATCGAGCATAAA     |                                       |
| CES11D1                                      | AAGCCACTGATGCGTACAA           | CAGAACGGCTGGCAAGATA        |                                       |
| CES11F5                                      | TACAGTAGCTGAGAGCTGTACT        | GTTTGGACTTGGCCTTTAC        |                                       |
| CES13A8                                      | AATCTGAGCGAGATGGAAGAAC        | GTGTCTAGTGGTTGGCTATGAC     |                                       |
| CES13D4                                      | GCCGTGATTGTGGATCTCTT          | CTCCAGACGTGCTGAATTGT       |                                       |
| CES15A8                                      | CCAGGCTAAATAGTTCGC TACA       | CGTAGTTGCATCTCGCTCTAAT     |                                       |
| CES16D4                                      | CATCAACGACCTTGTACATTATC       | GCACGAATCAGACAGAGAAGTA     |                                       |
| CES18D11                                     | GCGCTTGCAATAGCTTCAATTA        | GGAAATCCAAACAGTACAACCTCG   |                                       |
| CES19E7                                      | GAGCGAGAGAGATTGCCAAATA        | CGAATCGTGGAGTCTGAGAAAT     |                                       |
| 26E3                                         | CGTAACGGCACCCCTCAA            | ACCGCACCGCACTACAAG         |                                       |
| 25A3                                         | GCTCCAGGAACCGATCTATTG         | CTTGGCTTCCACTGAAGTTAGA     |                                       |
| 39A1                                         | CTCTGTTCACACAGCCATTTC         | TACTCTTTCGGGCGGTATAA       |                                       |
| 31E1                                         | TGGATATGGCTTCTGGTTCATC        | GGGCTGCATTCCGAGTTTA        |                                       |
| 31B1                                         | TTGTAAGGCGACTCGACTATTT        | TGCTTTCGGCTGACTAATGA       |                                       |
| 38E10                                        | CGACACAAGTACCAGCTCTAAT        | CGGCGAGGTAATTACCATATTC     |                                       |
| 40B3                                         | GCAGAAGGGGAACTGTGAAATA        | CTTCGCGGAGGGTTAATTGT       |                                       |
| 40F2                                         | CAGAACAACGCTCAGAGATAGA        | GGGCTCTAAGAAATCCTACCAG     |                                       |

**Table S2. Cloning procedures**

| <b>Pull down assay</b>           |                              |                              |                          |
|----------------------------------|------------------------------|------------------------------|--------------------------|
|                                  | <b>dir</b>                   | <b>rev</b>                   | <b>Restriction sites</b> |
| TRX-His-MSL2 [573-708]           | ttggaattcatggaggactacgttg    | agtgtcgacctattccctgtcaggagca | EcoRI Sall               |
| TRX-His-CLAMP [1-153]            | ctggaattcatggaagaccttacaa    | aacgtcgacttccccgtctgtatgcat  | EcoRI Sall               |
| TRX-His-CLAMP [40-153]           | ctggaattcatgaaaacggagcagcagc | aacgtcgacttccccgtctgtatgcat  | EcoRI Sall               |
| TRX-His-CLAMP [86-153]           | -                            | -                            | HincII Sall              |
| TRX-His-CLAMP [116-153]          | -                            | -                            | MunI Sall                |
| GST-CLAMP [1-196]                | tacccgggatggaagaccttacaaaaac | aacgtcgacagacacaatctgtatctgg | SmaI Sall                |
| GST-MSL2 [573-708]               | ttggaattcatggaggactacgttg    | agtgtcgacctattccctgtcaggagca | EcoRI Sall               |
| GST-MSL2 [618-642]               | -                            | -                            | BamHI RsaI               |
| GST-MSL2 [618-655]               | -                            | -                            | BamHI DpnI               |
| GST-MSL2 [618-667]               | -                            | -                            | BamHI PvuII              |
| GST-MSL2 [618-687]               | -                            | -                            | BamHI MunI               |
| GST-MSL2 [651-708]               | cagggatccaagccctgatccggtc    | agtgtcgacctattccctgtcaggagca | BamHI Sall               |
| GST-MSL2 [630-655]               | ctcgatccatgcagcatccttgggt    | gtggaattcctaatacaaggggcttg   | BamHI EcoRI              |
| GST-MSL2 [641-655]               | -                            | gtggaattcctaatacaaggggcttg   | BamHI EcoRI              |
| <b>Fly constructs</b>            |                              |                              |                          |
| pSK msl2-Fx3 full                | ttcgatatcatggcccagacggcactt  | tctccgggcaagtcacccagcccga    | EcoRV SmaI               |
| pSK msl2-Fx3 Δ36                 | accgatatcatggaggcatggatctg   | tggactagttaggcttatggggcagaa  | EcoRV SpeI               |
|                                  | ctcactagtcttgatccggcaccgt    | tctccgggcaagtcacccagcccga    | SpeI SmaI                |
| pSK msl2-Fx3 Δ13d                | ttcgatatcatggcccagacggcactt  | gaccggatcctgcctttctcattct    | EcoRV SmaI               |
|                                  | aaaggcgaggatccggcaccgttgg    | tctccgggcaagtcacccagcccga    |                          |
| pSK msl2-Fx3 R543A               | atcgaattccgcctgtcctt         | tctccgggcaagtcacccagcccga    | EcoRI SmaI               |
| pSK msl2-Fx3 ΔCXC                | ttcgatatcatggcccagacggcactt  | cggattcttctcggcttcggaggct    | EcoRV SmaI               |
|                                  | aagccgaagaagaatccgcacaagga   | cccgggcaagtcacccagcccga      |                          |
| pSK msl2-Fx3 R543A ΔCXC          | atcgaattccgcctgtcctt         | tctccgggcaagtcacccagcccga    | EcoRI SmaI               |
| yil Ubi msl2-Fx3 full attB       | -                            | -                            | EcoRV NotI               |
| yil Ubi msl2-Fx3 Δ36 attB        | -                            | -                            | EcoRV NotI               |
| yil Ubi msl2-Fx3 Δ13d attB       | -                            | -                            | EcoRV NotI               |
| yil Ubi msl2-Fx3 R543A attB      | -                            | -                            | EcoRV NotI               |
| yil Ubi msl2-Fx3 ΔCXC attB       | -                            | -                            | EcoRV NotI               |
| yil Ubi msl2-Fx3 R543A ΔCXC attB | -                            | -                            | EcoRV NotI               |
